# Supplementary material for: Interplay of the Influence of Crosslinker Content and Model Drugs on the Phase Transition of Thermoresponsive PNiPAM-BIS Microgels
Source: MDPI journal article supplement (doi:10.3390/gels8090571), 2022-09-08
Supplement: s1 [file s1]

## Article

# Interplay of the Influence of Crosslinker Content and Model Drugs on the Phase Transition of Thermoresponsive PNiPAM-BIS Microgels

Daniel Schlattmann and Monika Schönhoff \*

Institute of Physical Chemistry, University of Münster, Corrensstr. 28-30, 48149 Münster, Germany

\* Correspondence: schonhoff@uni-muenster.de

## Supplementary Materials

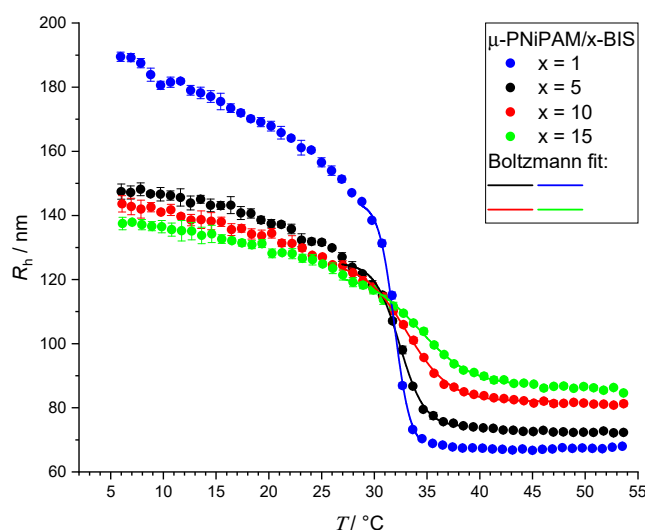

**Figure S1.** Temperature dependent hydrodynamic radii  $R_h$  of microgel structures containing different amounts of crosslinker. Results shown from a heating cycle starting at low temperatures. Lines are fits according to equation (4).

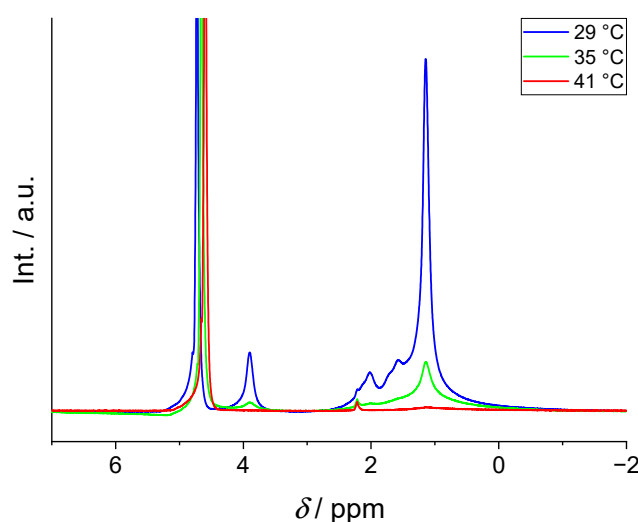

**Figure S2.**  $^1\text{H}$ -NMR temperature series of a microgel acquired with equal spectral parameters.

**Citation:** Schlattmann, D.; Schönhoff, M. Interplay of the Influence of Crosslinker Content and Model Drugs on the Phase Transition of Thermoresponsive PNiPAM-BIS Microgels. *Gels* **2022**, *8*, 571. <https://doi.org/10.3390/gels8090571>

Academic Editors: Hailei Zhang and Yonggang Wu

Received: 9 August 2022

Accepted: 5 September 2022

Published: 8 September 2022

**Publisher's Note:** MDPI stays neutral with regard to jurisdictional claims in published maps and institutional affiliations.

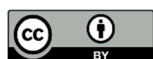

**Copyright:** © 2022 by the authors. Licensee MDPI, Basel, Switzerland. This article is an open access article distributed under the terms and conditions of the Creative Commons Attribution (CC BY) license (<https://creativecommons.org/licenses/by/4.0/>).

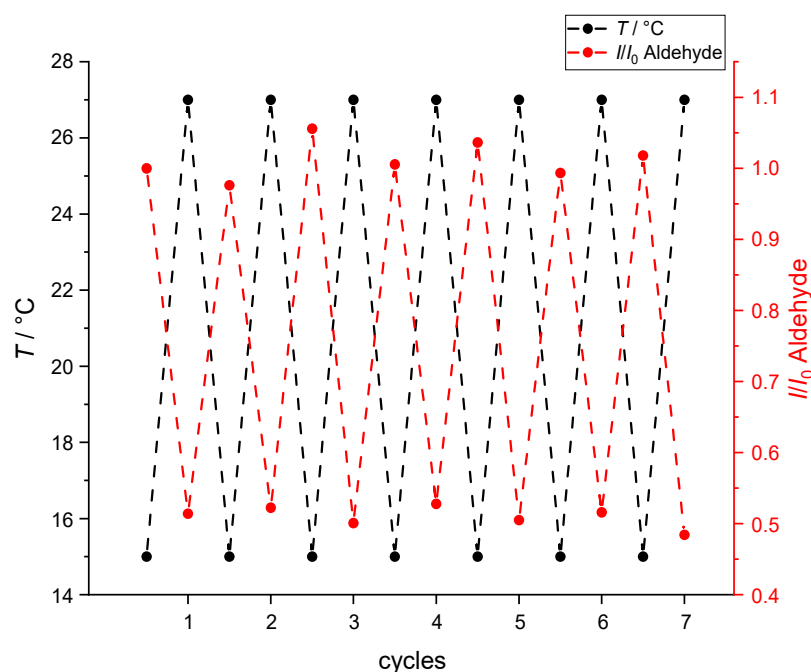

**Figure S3.** Integrated aldehyde  $^1\text{H}$  signal for  $\mu\text{-PNiPAM}/1\text{-BIS}$  with 20 mM *m*-HBA for a series of temperature jumps. Integrals are normalized to the value measured at 15 °C.

It could be shown, that the incorporation of additive is fully reversible and can be accomplished in the investigated time intervals.

NMR also revealed that incorporation of additives is *not* time dependent in the investigated period of time (2.5 h). Integrals are normalized to 15 °C. Equilibration time was 30 min at least. Data show no significant deviation from reached value at 27 °C and is forming a plateau, indicating no further reduction of  $P_{\text{inc.}}$  with time:

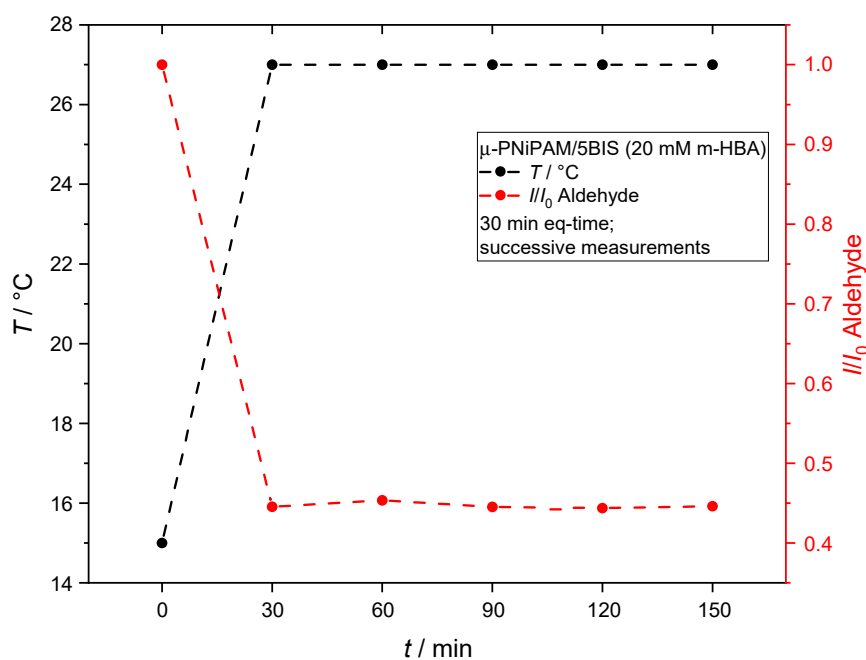

**Figure S4.** Integrated aldehyde signal for  $\mu\text{-PNiPAM}/1\text{-BIS}$  with 20 mM *m*-HBA in dependency of time, following a temperature jump.

## DSC

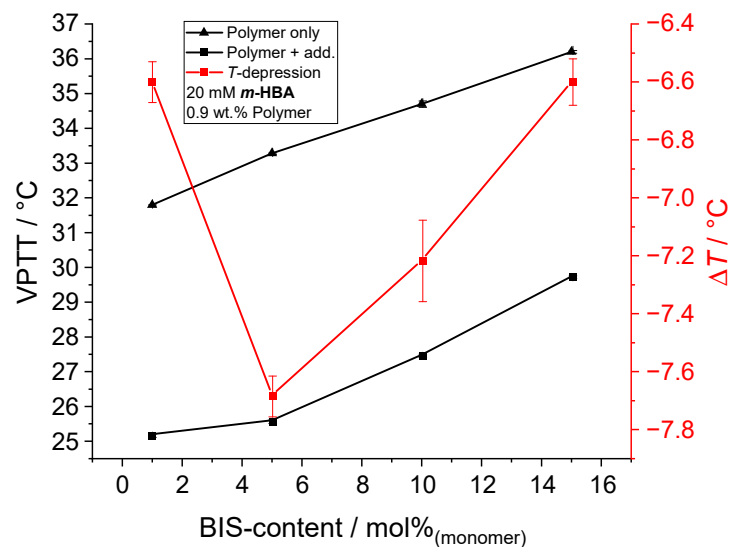

**Figure S5.** Plot of the VPTT (triangles: polymer only, black squares: depressed temperature) and calculated  $\Delta T$  (red squares) against the crosslinker content for *m*-HBA.

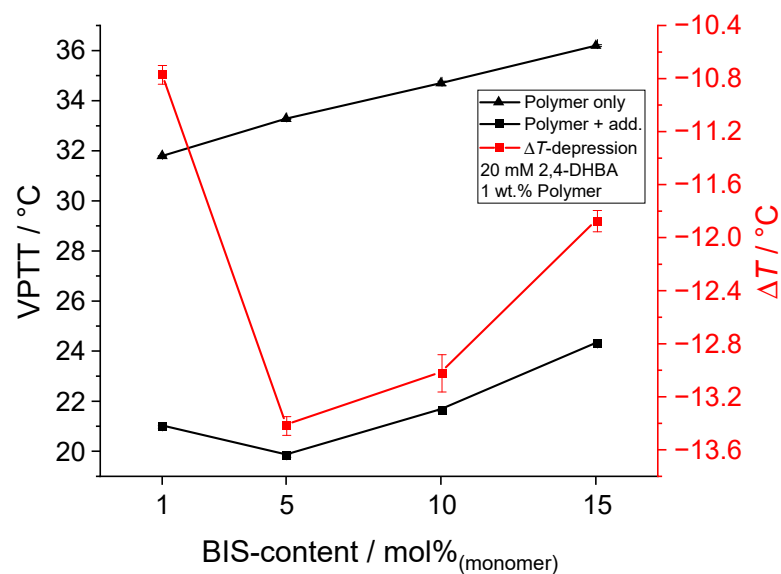

**Figure S6.** Plot of the VPTT (triangles: polymer only, black squares: depressed Temperature) and calculated  $\Delta T$  (red squares) against the crosslinker content for 2,4-DHBA.

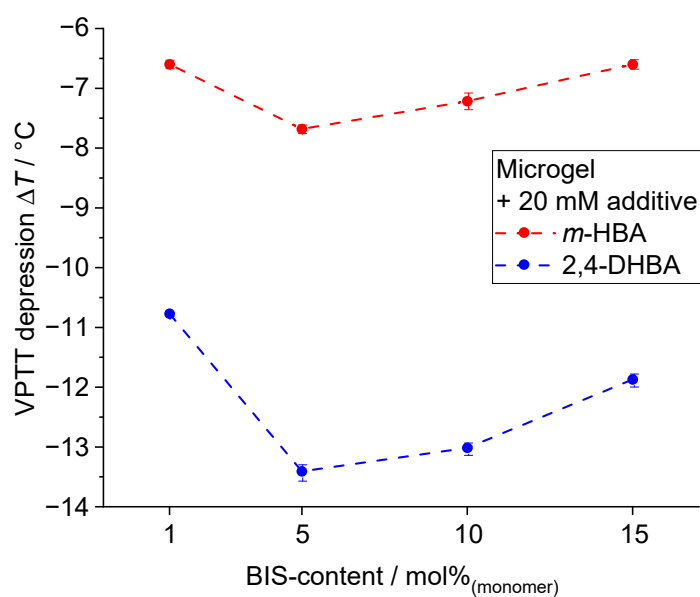

**Figure S7.** Calculated microgel VPTT depression  $\Delta T$  from DSC data in presence of two different aromatic additive structures. Concentrations were 1 wt.% for the microgels and 20 mM for each additive. Error bars do reflect standard deviation. Colorcode corresponds to the microgels VPTT influenced by additives relative to each other (low  $T$  = blue; high  $T$  = red).

## DLS

**Table S1.** Summary of DLS data for neat  $\mu$ -PNiPAM/ $x$ -BIS microgels in  $H_2O$  and comparison with reported data from Friesen et al.

|                      | $R_{h,15\text{ }^\circ\text{C}} / \text{nm}$ | $R_{h,50\text{ }^\circ\text{C}} / \text{nm}$ | $R_{sw,15\text{ }^\circ\text{C}/50\text{ }^\circ\text{C}}$ | VPTT/ $^\circ\text{C}$ | VPTT/ $^\circ\text{C}$ | $\text{PDI}_{25\text{ }^\circ\text{C}} \pm 0.02$ |
|----------------------|----------------------------------------------|----------------------------------------------|------------------------------------------------------------|------------------------|------------------------|--------------------------------------------------|
| $\mu$ -PNiPAM/1BIS   | 176                                          | 67                                           | 2.6                                                        | 31.9                   | -                      | 0.06                                             |
| $\mu$ -PNiPAM/2.5BIS | -                                            | -                                            | -                                                          | -                      | 34.1*                  | -                                                |
| $\mu$ -PNiPAM/5BIS   | 143                                          | 72                                           | 2.0                                                        | 32.4                   | 35.7*                  | 0.02                                             |
| $\mu$ -PNiPAM/10BIS  | 138                                          | 81                                           | 1.7                                                        | 33.0                   | 37.1*                  | 0.04                                             |
| $\mu$ -PNiPAM/15BIS  | 132                                          | 87                                           | 1.5                                                        | 34.3                   | 38.6*                  | 0.03                                             |

\*Friesen, S., et al., Accounting for Cooperativity in the Thermotropic Volume Phase Transition of Smart Microgels. Gels, 2021. 7(2): p. 42.

We note that absolute phase transition temperatures may differ, caused by different synthesis protocols. Nonetheless, temperature shifting trend remains the same.

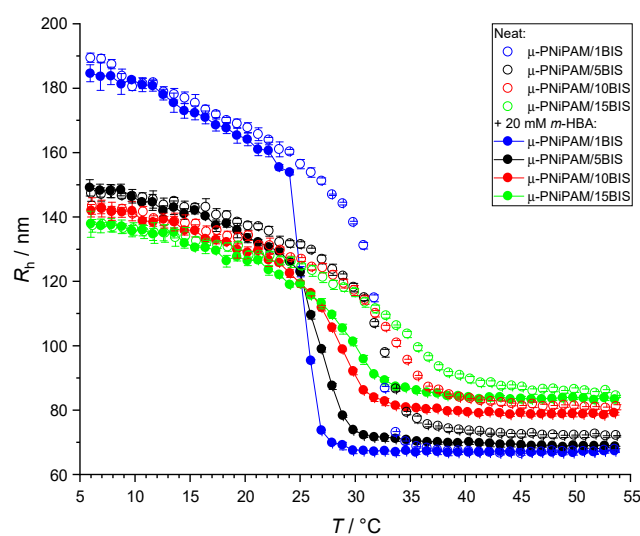

**Figure S8.** Temperature dependent hydrodynamic radii  $R_h$  of microgel particles containing different amounts of crosslinker (hollow circles: neat Polymer; solid circles: 20 mM *m*-HBA). Results shown from a heating cycle starting at low temperatures. Lines are guide to the eye.

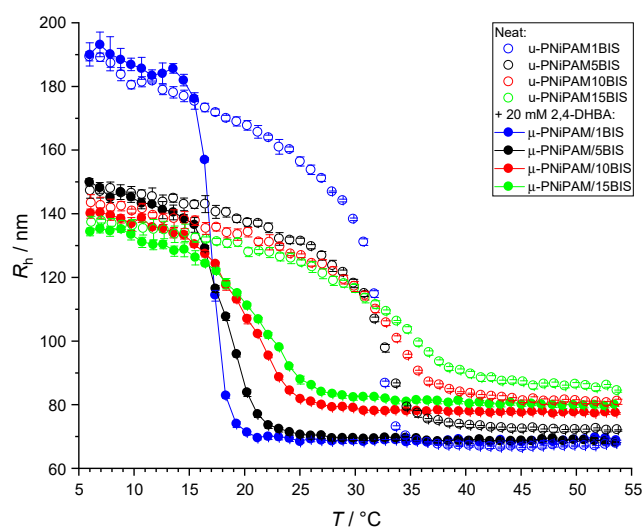

**Figure S9.** Temperature dependent hydrodynamic radii  $R_h$  of microgel particles containing different amounts of crosslinker (hollow circles: neat Polymer; solid circles: 20 mM 2,4-DHBA). Results shown from a heating cycle starting at low temperatures. Lines are guide to the eye.

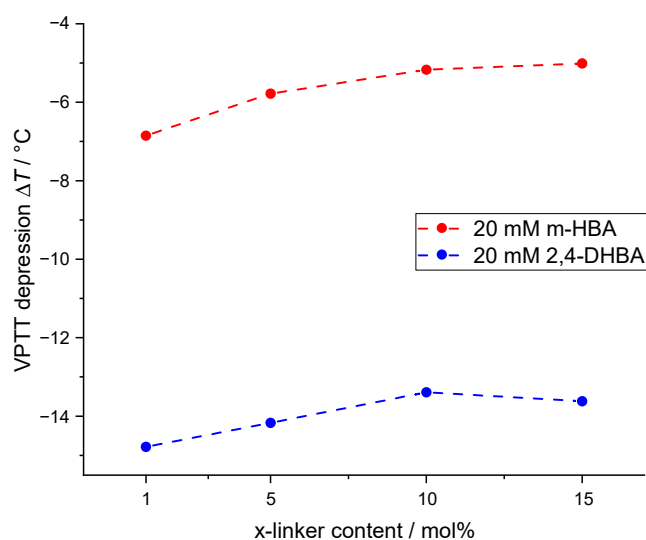

**Figure S10.** Calculated microgel VPTT depression  $\Delta T$  from DLS data in presence of two different aromatic additive structures. Concentrations were 1 wt.% for the microgels and 20 mM for each additive. Error bars do reflect standard deviation. Colorcode corresponds to the microgels VPTT influenced by additives relative to each other (low  $T$  = blue; high  $T$  = red).

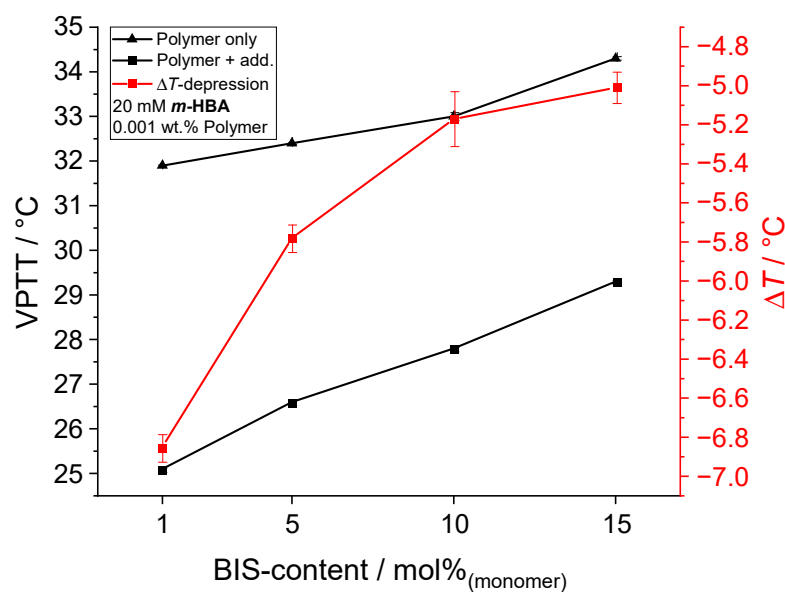

**Figure S11.** Plot of the VPTT (triangles: polymer only, black squares: depressed Temperature) and calculated  $\Delta T$  (red squares) against the crosslinker content for *m*-HBA.

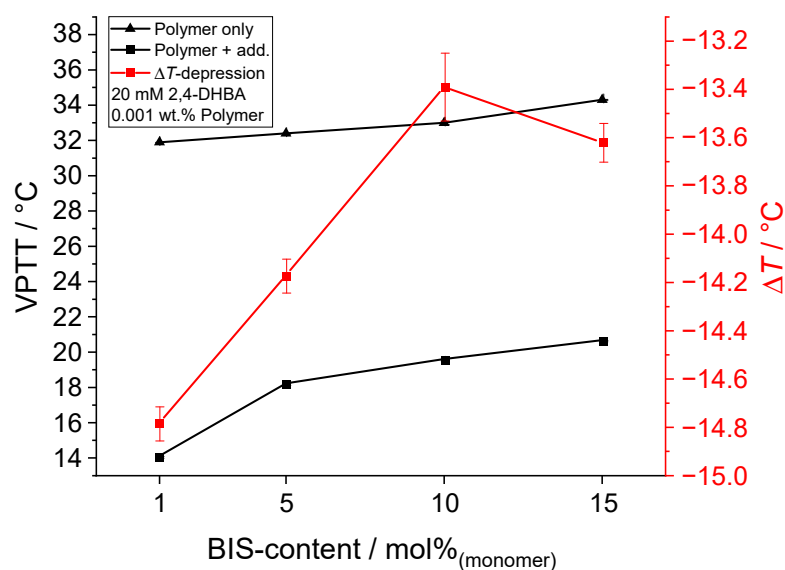

**Figure S12.** Plot of the VPTT (triangles: polymer only, black squares: depressed Temperature) and calculated  $\Delta T$  (red squares) against crosslinker content for 2,4-DHBA.

## NMR

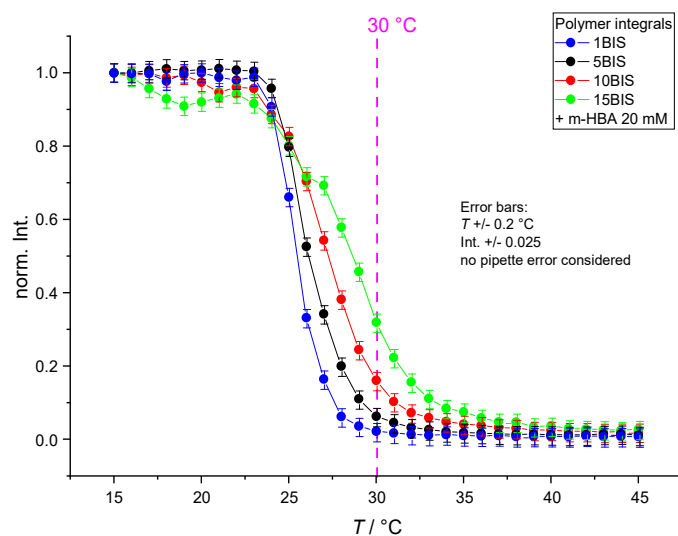

**Figure S13.** Integrated normalized polymer signals as acquired in  $^1\text{H}$ -NMR temperature series for neat microgels containing different crosslinker content and 20 mM of *m*-HBA. Lines are guide to the eye.

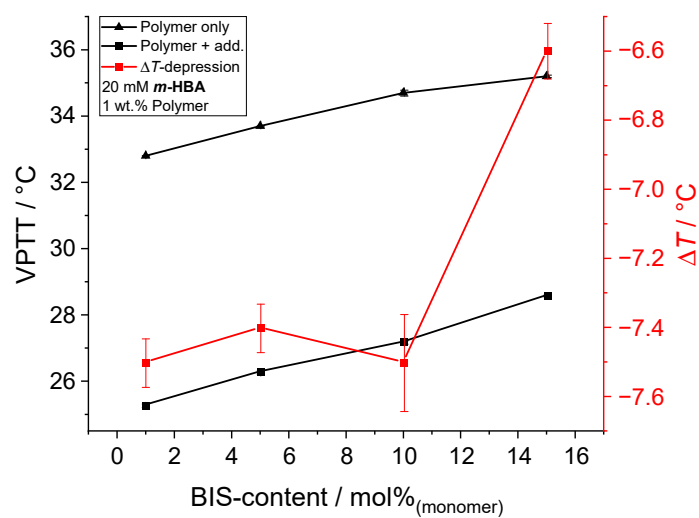

**Figure S14.** VPTT (triangles: polymer only, black squares: depressed Temperature) and calculated  $\Delta T$  (red squares) against the crosslinker content for *m*-HBA.

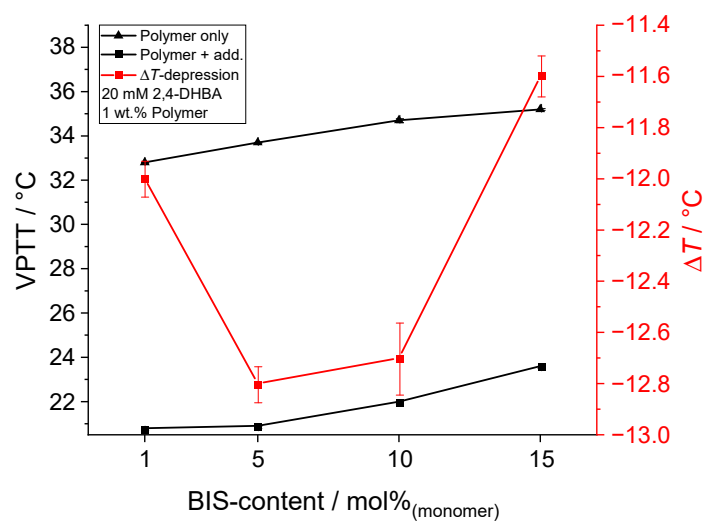

**Figure S15.** Plot of the VPTT (triangles: polymer only, black squares: depressed Temperature) and calculated  $\Delta T$  (red squares) against crosslinker content for 2,4-DHBA.



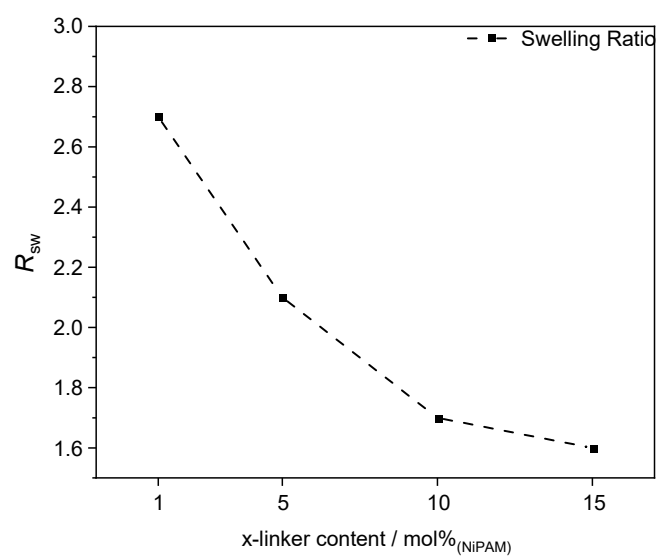

**Figure S16.** Swelling ratios  $R_{sw}$  for differently crosslinked microgels.
